# Supplementary material for: Diffusion of Messages from an Electronic Cigarette Brand to Potential Users through Twitter
Source: PLoS One. 2015 Dec 18;10(12):e0145387. doi: 10.1371/journal.pone.0145387 (PMC4694088; doi:10.1371/journal.pone.0145387)
Supplement: S1 Table — (XLSX) [file pone.0145387.s001.xlsx]

## Sheet: original
S1 Table. All tweet ID's by month and layer
February			March			April
Layer 0	Layer 1	Layer 2	Layer 0	Layer 1	Layer 2	Layer 0	Layer 1	Layer 2
429412857625600000	429413462117076992	429473805661401088	439743844884938752	440516680653889536	439596568862547969	450973812604297216	450974860999950337	450986651855355904
430384064076333057	430397584533102592	429636177315258369	439839349006671872	440539207430582273	439598387248119809	450993198245376001	450982857482059776	450993198245376001
430384856237752320	430403513940983808	429657580890521600	439974202616348672	441470310953807872	439600933270327296	450993266830635008	450983751674515456	451007145589211137
430689861579067392	431249592324464640	430138739323461633	440108935089885184	441580015126196224	439626732417843201	451023772791746561	451024435961536512	451076210060042240
430689903744385024	433604210190745600	430139198549807105	440122614380789760	441634306360745984	439656715051466752	451026902028140544	451026622649356288	451099858330722304
430690373120192514	433722388723679232	430160129304961024	440458651673690113	442030301221384192	439673326756057089	451103253791789056	451048053349572608	451105294102192128
430705708787449856	434002012812738560	430800353509244928	440458858977185792	442073313943490561	439674409557557249	451103415947767808	451108602833432576	451113737185816576
430708617637928960	434385230548303872	431095306592067584	440516606838325248	442641907546865664	439685490141188097	451103504460161025	451112554170175488	451117091689865216
430710424107888640	434414068334469120	431159439174172672	440563549518454784	442641920209059840	439687954210889728	451103705300234241	451115651633930240	451127418166968320
430800224479485952	434440178904883200	431163978975559681	440666849475178496	442680007593185280	439701839215620096	451107051897630722	451132913644363776	451143771137536000
430805399722131456	435287080881512448	432202321137655809	441020364748226561	442689700860817408	439752318918361088	451300668834603008	451144869680267264	451167318820012033
430817071035723776	436236305308323840	432204354926702592	441233968432553985	442785695724105729	439803008118169600	451300789169176576	451150981389369344	451168426019409920
431103433001926656	436276209862049792	432205605382930432	441241681896411136	443036631915061248	439803118994620416	451303001068953600	451165235433332736	451171016673226752
431151182497996800	436593656993427457	432206987711897600	441243658525110272	443050685912055808	439809486333960192	451430997511254016	451170833160224768	451180230355333120
431173711241019392	436641512592769024	432207365921062912	441246109902450688	443061501583437825	439827445529587712	451751402621005824	451192063770378240	451185628118405120
431216522129059840	436645987210502145	432212343016005632	441257299198631936	443113432582459393	439876071555469312	452195007110205441	451444462125056000	451201966547685376
431383034274000896	436767599020347392	432212582314020864	441277095553949697	443114662809583616	439885247363436544	452792854851903490	451444950165913600	451207120382590976
431424518049902593	436886982686670848	432213318674042880	441294115339517952	443116209484365824	439973583561822208	453165602740649984	451767352225320960	451226013574262784
431424567488544768	436887093588283392	432221236525948930	441312043442794496	443116870372057088	439974795837718528	453165976138551296	451838012494979072	451263326723801088
431424701244506112	436951849699401728	432229203354738688	441342520354963456	443123480977231872	439975953570484224	453224828691308544	452499514210144311	451365099891343363
431456033916325888	436953056971083776	432254517305155584	441372099245273088	443174713779843072	439976000483778561	453225349795823616	453241311572021248	451388186900459521
431456095517687808	436982893299388416	432278955383480320	441941986006667264	443187583632175104	439985819638849536	453235165624414208	453255138267115520	451394366376914944
431529273396973568	436986352865783808	432633582272933889	441982051240398848	444329603067162624	440005542111498241	453276564449669120	453635096789008384	451396974101946368
431875305423110144	436997192407330816	432633729899433984	442027435304177664	444451500580827137	440009127213793280	453322075739291648	453637338157940736	451397068620173313
432218635797794816	437099972798840832	432635409194315776	442031322903875584	444456288676618241	440009986479894528	453532904275337216	453637896436580352	451410273773965313
432898203181010944	437151560561221632	432635497282674688	442078164551233537	444462700303634433	440026300301180928	453634696534974466	453640438704898048	451413648561680384
432898322366357504	437181578620710912	432635943787700224	442106341772247040	444462889420984320	440028107857084417	453645774132228096	453640611812241412	451415599915479040
432898448241610752	437181640860000256	432636140793757696	442320819776008192	444462910668951552	440035144506691584	453980605001109504	453641596194402304	451445404417425408
432898642517573633	437183228903165952	432636491995828224	442321023585640450	444463231910674434	440041809843351552	453981908393656320	453646326853427202	451500340278333441
433280796166606848	437249830206070784	432639085405290496	442447891144400898	444464066858188800	440043543428493312	454212185708064768	453648343550267393	451508042052280320
433580248488091648	437250519833128960	432656015109419008	442633120278663169	444467073087856640	440044693275955202	454212664072626176	453657049037934592	451509907888427008
433715112264736768	437253024801890304	432694424812802048	442639864505585664	444468179973054465	440044707867934720	454326524800667648	453664364994646017	451520603204636672
433955909144834048	437253334798721025	432700503982493696	442706240171687936	444476859959357440	440050481818505216	454337152009379840	453913934417133568	451524464883138560
434053254327332864	437254150079139840	432700546802130944	442824599143972864	444479544100421632	440053953867177984	454337360063660032	453913976897024000	451526523380850688
434064929583546368	437256111801241600	432708385159802880	443049882954522625	444482782455013376	440080563085402112	454350256247799808	453914005783212032	451535865228320768
434366051426385920	437259830508912640	432711440311414784	443078298592366592	444484564551888896	440081432061284352	454396071612260352	453914042554675200	451542756339752960
434383189990072320	437264917331443713	432816178843893760	443109684199686144	444488695085678592	440101181722206208	454396190369779712	453914098108215296	451552570691952640
434384926368997376	437273422050365440	433094501356556288	443112870814183424	444500580321337345	440142818678681600	454397794175164416	454118693887164416	451559225362108417
434425594755825664	437275070638350336	433251318669795328	443122158144094210	444521806330728448	440165577001144320	454399315193389056	454118726338502656	451624312362246144
434433369997180929	437300611529596928	433254564545200129	443126177763717120	444522191057858560	440165600359219200	454399509037346817	454118752888451072	451624381262098432
434433568308477953	437308101369155584	433255318202494976	443126263427784704	444583333909909504	440174517269573633	454643812242321408	454118760694046721	451625915374907392
434434412122361856	437311820475273216	433289060153434114	443175823139672066	444608965138460673	440186743040380931	454709082323435520	454118774455537664	451625916964556800
434435613463302144	437328483467788288	433289958984781825	443175860330594304	444621360111689729	440188423941664768	454717233089220608	454118789567631360	451665955652120577
434440039871696896	437372813327233026	433325836389715968	443179379011903488	444634488316772352	440191817603383297	454719862037020672	454351631854104576	451678645984440320
434444151388532737	437394393108987904	433337486454968320	443179573996703744	444653079515103232	440199744003248128	454767812729643008	454385754232606720	451725429204742145
434445587170074625	437736825046966272	433364935410610177	443179966726156288	444669919125590016	440204197439754240	454767973392478208	454385794837663744	451732941123899392
434462105404993536	437931172099022848	433433465472970753	443368732342382592	444670194024075264	440208504163295232	454768088249282560	454812205314482176	451776800700768256
434463291365416960	437996593770270722	433433578492678144	443380198390910976	444671254717812736	440212922200252416	455310626987212800	455383794871058432	451800319383465984
434502035481063424	438011892779327488	433433584188547073	443413302753128449	444870740819443714	440217884758142976	455686429335883776	455781670294003712	451813318723108864
434508386840109056	438012271152103424	433460954568081408	443806174761459712	444882719227408384	440229672874287104	455686502975291392	455781896589688832	451838661756485632
434759289438470144	438015326585126912	433752352609554433	443845636916805633	444893909131735040	440231498226995200	455781565008605184	455791019037306880	451838809827971072
434788543320559616	438066317779042304	433774296800849921	443898515006439424	444894015692226560	440235826773893120	455782126118785024	455794600175624192	451838868481146882
434794403266174976	438066436255121410	433792189907599362	443898690210893824	444895995218771968	440243367503355904	456088069972561920	455839349180227585	451840548161073152
434799168729915392	438067934666051584	433792597019336705	444072503674437633	444896565291798528	440243683946815488	456152275379970049	455841444532858880	451842608030318593
434859321491353601	438085497122873344	433827209745543168	444072700429221888	444898690952884224	440247079521091584	456174538334547969	455846175501869056	451843221300072449
434860248260968448	438099131912175617	433827824655278080	444193515967643648	444901810520989696	440247232747429888	456184364863217664	455846476401627136	451848754824769536
435029670418202624	438099609723088896	433828023893110785	444201603806281728	444941711161057280	440248605568679938	456184401009704960	456176547020296192	451865644481667072
435850490404818944	438137219812163584	433841316774936576	444214915054596096	444986952576544768	440249357913190400	456211967007416321	456178156115095552	451866750548582400
435854579960250368	438137276556910592	433843222545047552	444215179341869056	445027469553180675	440250846593679360	456220913814749184	456178418900402177	451883997249798144
435854758176251904	438432043215888384	433843348114132992	444215468425895936	445065847069880321	440253189435039744	456407427269685248	456198058708328449	451889554073870336
435925886324330496	439425078028410880	433843375721418752	444215804746555393	445068714526789633	440281747054264321	456440219709886464	456198167088726017	451894070407733250
436129901985660928	439490199790571520	433845119956316160	444215839735033856	445069514007252992	440283927693910017	456464542168395776	456238123127545856	451908407550025728
436129994461294592		433852686862008320	444216574799400960	445070091747885056	440284387259990016	456466997782388736	456238253461745664	451910306504007680
436140950826401793		433856382421716992	444218557207810048	445073861751472128	440354014123663360	456468106269843456	456341732343709696	451910960509632512
436178016817774593		433865483779964928	444225129409552384	445246501187756032	440375382282211328	456469000977805312	456421203331526656	451912973062119425
436212677132955649		433885712979886080	444227780096446464	445611615480586240	440481801723588608	456469119395565568	456442437649440770	451919566822600705
436229850740043777		434007906321973248	444228479182450688	445688322489597952	440481843414982656	456477317124988928	456442559665954818	451926972965613568
436247864948555776		434021637957365760	444228758266839040	446469335461019649	440515812286550016	456478079653642240	456471255256809472	451976973825609728
436247876281573376		434039841785794560	444229119820046336	446483922835091456	440518078477369344	456479468802940928	456491896131428353	451979789822226432
436247929620533248		434046426914377729	444229543495077888	446665673389793282	440529838374281217	456484352122040322	456518913971347458	451984882412290048
436250690605056000		434086642882600960	444230493664317440	446670291440513024	440559320091340801	456489049130151936	456553733304754177	451985713383636992
436253273604259841		434094108215607296	444230686447124480	446670423011639296	440561340793380865	456489302856179712	456556340417015810	452055406492528640
436320629097119744		434103919363387393	444231788995440641	447094305547902976	440584472942366721	456490553752813569	456583255089635329	452107635907903488
436320911889670144		434347348580249601	444233459662217216	447095337560600577	440646828174749696	456498309490696193	456623554079899649	452110923470503936
436336840283811840		434347387189215233	444234030666366977	447098855994449921	440646994701197313	456526997959606272	456808654985895937	452119160747589633
436450716975366144		434350400490074114	444234404005969920	447101889989980160	440647093573533696	456536953282785280	456842787997364225	452124792494514176
436470853492961280		434362103781007361	444235045805371392	447103236617826304	440647249681321984	456537013928222720	456846244829077505	452131830766911488
436515609724321792		434399565123305472	444236159577645058	447104752820563968	440647496822312960	456551733720674304	456880244360609792	452134342786285568
436539732957605888		434404173019222017	444236889571078144	447105663517589505	440647600547831808	456553150632062977	457006102245171200	452155949046718464
436627227850326017		434415551306555393	444237645787316224	447111199381929984	440650822494343168	456574445755191296	457006120716890113	452208453961129985
436878563220807680		434421509877399552	444237930643476481	447127802186190849	440650972788830208	456840782784106497	457173900255047680	452209498438901760
436881123818635264		434456986265354240	444238173351067648	447127852815634433	440651347428245504	457120447197245440	457227104065961984	452239693305114624
436942643848040448		434516961373220864	444238946587779072	447128378387070976	440654440270290945	457120963616702465	457227128632016896	452239714867621888
436945429381779456		434516992163188736	444239376411672576	447130410825179136	440945766711164929	457121465913974785	457317789284716544	452254760096505856
436945809666764800		434516995347075072	444239793380028416	447133421111107584	440999562426458112	457273765315899393	457580602959466496	452254804874911745
436946020006887425		434839181362081792	444241316021432321	447136543996530688	441021134411026432	457361132861538304	457654474186567680	452257138883039232
436946422152564736		434850635825946626	444243379006631936	447137585551261696	441044052079673344	457486763435761664	457654532374134784	452262948233166848
436956842368196608		434851429463756800	444243798248271873	447149770919120896	441044963673907201	457486888941912065	457656659205431296	452262966927175680
436977340774899712		434895923551150080	444245117545635840	447149840154501120	441060689709256704	457487136615587840	457912113412206593	452263025421348864
436977365055729665		435086171203727361	444245597952811009	447150386949152768	441191030906314752	457580078197915648	457912630557306880	452264186127847424
436981816612753408		435094239064887296	444246204243660800	447151358777769984	441191255947505666	457597142870532097	458063630336917504	452264740975165440
436984949384953856		435103883829211136	444246888095547392	447165713656975361	441209652412313602	458296727532228608	458063662469509120	452287353659203584
437008704723247104		435167426716520448	444248565783592960	447214255956586496	441225632341823488	458300751970725888	458098822137540608	452305392094019584
437314028117835776		435241959452860417	444249069758582784	447491723548442624	441236871721779200	458305647956606976	458124779942576128	452305743623225344
437573857516331008		435300203948961792	444249559829463040	447658548856901632	441277019150491648	458306636843470848	458259314356932608	452320674128732160
437616111669235712		435306317155028992	444249788326764544	447749894518738944	441286965820801025	458308786474606592	458297199722381312	452343597233631232
437654266367332352		435381816166719488	444250157064785920	447789480796487680	441313082523262976	458308903759917057	458297408288735232	452344783244374016
437727358909313024		435382073495654400	444250343082164224	447789937824256000	441316262895816705	458310498912460800	458298829108830208	452349452217778176
437727454493290496		435395916921851904	444255419129548800	447791066734161921	441317502862495744	458314008110460928	458298891696218112	452354495495016448
437730875770687490		435395942100271104	444255915760287744	447792195782082561	441328076656766976	458316127513219072	458302344623448064	452421488092917761
437952715583651840		435396150544564224	444256180471214080	447795196520968193	441328164372217856	458318455528120320	458309890445168640	452542222752165888
437961199398162433		435418862931439616	444256509514354688	447795878364188672	441329623285391360	458319994267267072	458324722116485120	452542342575034369
438010929398030336		435721336216768512	444257422287196160	447814300443234304	441349493494018048	458320501941624832	458329461327691776	452543048782970880
438048144379895809		435721370106744833	444257912974618624	447814385453375488	441350454316761088	458324473381285888	458345294326145024	452555380657516544
438065702717902848		435726381235044352	444258665659248642	447814551224852480	441350848665223168	458325271188230144	458350347619405824	452560769910321152
438066302805356544		435776869427081216	444259003044855808	447814563707518976	441354926057594880	458339525098344449	458353012365590528	452574316669190144
438067707981070337		435778671237144576	444260238443548673	447819020822016000	441356499873697792	458339848860864512	458360606291394560	452586579966849024
438068190275702784		435789727321837568	444261038628675584	447830360228114433	441357409949200385	458341919190310912	458360644014977025	452589752592912384
438069473787248641		435807236636823552	444261404728500225	447958618848366592	441361264393351168	458342189907447808	458361037008277504	452590844579573760
438071345348620288		435822433065779200	444263938356551680	447964117077618688	441367982506127360	458348447813218304	458362932594999296	452594103427952640
438072627023077377		435822702746947584	444265711892836352	449230162224513024	441410812230397952	458642411384627200	458377878506205184	452597916989796352
438073396468133889		435823704237686784	444265788292472832	449371380266463232	441410941213634560	458656068235558912	458377976829050880	452612953682898945
438076223525109760		435830683681161216	444268693426434048	449526302547402752	441425613166243840	458660445315166208	458381955742957568	452613036910460928
438078529004396544		435853041930354688	444269600402726912	449609037215440898	441460922142318592	458662805169004544	458383099458363393	452638235265490944
438093287115993090		435857230324580352	444270357583634432		441517937745494016	458664537047457795	458395759193239552	452641648212602880
438094794523693056		435859496062447616	444273752076206080		441549147024285697	459025462778281984	458395786829524992	452653358919467009
438110258654089218		435879156883398656	444451427755511808		441549620280565760	459030184595685376	458405818916810753	452654684277190657
438279205437341697		435879178677010432	444501985811644416		441549700131737600	459030569246928897	458409849143840768	452655139854483456
438343753582268416		435886545825189888	444555861847859200		441552268891262976	459031740321775616	458409930228129792	452661139831545856
438404346318163968		435888145092321280	444562066204938241		441554520536272896	459036410230501376	458510493465194496	452661515774988289
438411678745493504		435890937240489984	444566161225564160		441563974023512064	459041558260486145	458582541726154752	452663750001426432
438696036371271680		435891683213856770	444568079675056128		441564676426842112	459046474110619649	458604555186753536	452720944125997056
438769483495526400		435891755989233664	444568739212566528		441564689253007360	459047239176830976	458683025761374208	452721012254449664
438820898762936320		435891844921053184	444572051219963904		441578326021255168	459049284349214720	458691616337711104	452722777758642176
438821911121100801		435891865271812096	444572820815630336		441578721745461248	459057138589908993	460045621509255168	452796932742975489
438846829082718209		435892365404823552	444573371833921536		441578777681096704	459061078836539394	460093273155985408	452808647912214529
438847054195220481		435895103362981889	444573927243669504		441602526807621633	459061242447925248	460111353772904448	452809923576225792
438847541934063616		435914788460560385	444574518997049344		441693245706219521	459072783423528960	460158972696465410	452812988568043520
438852765667041280		435921123226578945	444579680922791936		441695451847221248	459072867376697344	460159018687016960	452821592998150144
439025241629937664		435927942225739776	444581769094766593		441701781840883712	459073719176945664	460231124682153985	452824940492771329
439027960394579970		435988725915328512	444582747340693504		441711619878313984	459103927502245889	460271868176396288	452826539370242048
439029152990388224		435998679527616512	444585678609739776		441713122374864896	459108038050197504	460492871372922880	452831027443286016
439342936569171969		435998698456510464	444586542753775616		441717733181255680	459108911379800064	460521952285696000	452831603455455232
439404433001426944		436016624093519872	444590658460721152		441727910223675393	459388319709659136	460610118724616192	452856374574473216
439406816964128769		436016804830248960	444592490310422528		441734686021148673	459410212043390976	460866348592013312	452872683890683905
439434231044141056		436032591754702848	444596510949253120		441738154110771200	459423352562532352	460866393689190401	452879564390150145
439445433946210305		436039001519038464	444597193140215808		441763606581870592	459438747868598272	460889718432231424	452903395884417024
439490829405925376		436063083988275200	444598763609272321		441822847770431489	459469811211182080	460891056822030336	452905956184453120
439494866079608833		436081531300216832	444601983379316737		441833418586738691	459753358832578560	460907588914520064	452910161141977088
439495084913221632		436126029296726016	444603863551586304		441948507180892160	459772764933484544	460932646915162113	452916683124924416
439517420634796033		436161439670468608	444607452474916865		441950197984555008	459773825010249728	460932726250422272	452919324823793664
		436180228608516096	444611225599479808		441950282965352449	459774538339737600	460945094669922304	452955366754512896
		436224877037912064	444613520152227840		441959382050693121	459784786421108736	460945351088676864	453025893481324544
		436225494376513536	444615251950985216		441959456881278976	459793506588839936	461004577643302912	453026611081011200
		436226668509028352	444616728421470208		441959694400106496	459796631454371840	461060752799842304	453037346246897664
		436237793715830784	444617528635961344		441962054908665856	459797240123367424	461067847322845184	453115516446441472
		436264691158237184	444618154233196544		442012935817527296	459801961009659904	461130283547648000	453157485344747520
		436270327711412224	444619275462905856		442013270153887744	459815892390785024	461140054815956994	453162652156854272
		436273232313085952	444619529008590848		442015504228945920	459818023067844608	461140247217045505	453182232086466560
		436277097846558720	444620637982568448		442037716151042048	459874700454158340	461180358558371841	453184865505394688
		436289836312313856	444652306731397120		442042486072946688	460100641717633025	461194391529353216	453189919381676032
		436299789379334144	444819601759952896		442048857334349824	460123521591439360	461204340234256384	453190990296547329
		436314879457513472	444844144989851648		442059318343397376	460126718615777280	461210140364922881	453191757161709568
		436319186139484160	444849541192228865		442059326895579136	460149279621783555	461243634843942915	453191948527230976
		436321059353415680	444850419215249408		442059335535849473	460149636590620673	461252188883652608	453192203104694273
		436361382096015360	444854641608515584		442071701925281793	460149699966545920	461281433865031680	453192954023538688
		436369813435596800	444855109021728768		442072425719943168	460150036211318784	461293172862119936	453195317337268225
		436386978003570688	444855965758660608		442082040297840640	460183408962846721	461293344857935872	453196716725260288
		436390701098872832	444857913538904064		442100321590857728	460206065674498052	461321672248012801	453197732464037888
		436398655382114304	444859343930810368		442104666831085568	460448782870536192	461354685103095808	453199642306805761
		436423010393030656	444859973030277120		442106264810979328	460475050420740096	461418191747424257	453200095790792704
		436438451798683648	444860431744499712		442106320515133440	460485053282136065	461464193074356225	453201992748261376
		436496593731469312	444861218142957568		442106790218432513	460509300247371777	461495660408082432	453212785342955520
		436546062258798592	444863914946203648		442106969168838657	460510219550748672	461563504999559169	453215289564733440
		436548074862051328	444865745755729920		442109318637158400	460510958058610688	461573026417766400	453216290220818432
		436559443736920065	444867503357849600		442134460960899072	460511264867745792	461586275833618433	453217263395811328
		436560125726588929	444869826339540992		442137279503425536	460550755573706752		453230658857361408
		436560293960110080	444870033190047744		442137826705297408	460585697800249344		453237116793651200
		436560713281454080	444870538226171904		442162916922773504	460596957291892737		453243114082156544
		436566500615663616	444873017634459648		442201159898374144	460600308360429568		453243664639471616
		436566638775648256	444873876678258688		442215224817373184	460611881737011200		453244558541742080
		436566810956398592	444875188153229312		442215290894422016	460761031036653568		453245100907573248
		436577104566562816	444878991803969536		442221678819827713	460781654336761856		453249454297333760
		436582090956886016	444879845625843714		442270877162672128	460811553869414400		453256540569739265
		436592908893175808	444881073961312256		442363154014547968	460838456499781632		453266308961144832
		436593381259489280	444881875006283776		442376833409888256	460839097230454784		453266335473348608
		436599924558671872	444882857098362880		442377542117236736	460847000184172544		453266344117805056
		436601432247382016	444885989559787520		442378960458883072	460886758428004352		453266728592875520
		436603634768678912	444893420994457600		442387135333945344	460896655944843264		453271257023135744
		436606636653027329	444982097393229825		442441645003640833	460896698886139904		453271645554089984
		436614211436048384	445033099240685568		442448035411288066	460920308673679360		453271724491292673
		436617290927570944	445192090193260544		442456155114446848	460958627126198272		453274914401689600
		436618156506095616	445293567205179392		442464717702201344	461188351605751808		453277738959261698
		436618569951232000	445317809178808320		442487978800472064	461191465624821760		453277920883376128
		436623008258879489	445318784916525056		442496688192618497	461194598627291136		453279788271435776
		436627556939608064	445322013968592896		442650948335198208	461203408805179393		453280354669838337
		436632037873954816	445325566313394176		442725876531085312	461215448462540800		453280437205733377
		436644004093251584	445326944461012993		442726050112757760	461215664997666818		453280574804090880
		436646123919663104	445328395669213184		442726921244135425	461215771918860288		453280948407111680
		436647163029098496	445566573601124352		442728016423034880	461216930989223936		453281129114521600
		436655758743068672	445567338189193216		442734183807344640	461244583880695808		453282729832898560
		436659457188446208	445674627743100928		442746568324575232	461244649840312321		453282802474049536
		436660496612491264	445878148388122624		442768067446063104	461246242501455874		453284214155542528
		436661287159087104	446068610545750016		442800990027149312	461246278241091586		453284251190824960
		436669721052979200	446068713289416704		442816932324990977	461246725886590976		453285469066133504
		436681314985840640	446068991526961153		442824599143972864	461250175223083008		453292654160117760
		436704703901339648	446070551308951552		442835132718669825	461252251865346048		453292929013264384
		436756602264506368	446276908574326784		442842452266078208	461252849624563712		453299360852623362
		436763379215396864	446277170756087808		442861205720293378	461254053994192897		453302565153673216
		436837676428566528	446277367536033792		442865311382241281	461279608508518401		453303812535513089
		436841076599840769	446282415460589568		442987359244525568	461280126236651520		453305534360219648
		436841144740499456	446290930124222464		443013002216751104	461280426083225600		453307857220673536
		436841374093422592	446317503174541312		443013594657996800	461280595189182464		453308099940843520
		436841967646167040	446329017897975808		443017247204732928	461280918599401472		453308490204069888
		436842086982488065	446332822756663296		443035557761806337	461281373199032321		453309206238887936
		436842600017190912	446334099234766848		443051237714300928	461282347837816832		453312347008802816
		436843175479873536	446364374202986496		443055528994811904	461459528241135616		453312769157124096
		436845022601019392	446366001727148032		443059241499099136	461519583846084608		453321021178011648
		436845378445770753	446366289636777985		443059594395267072	461580916616626177		453321425667887104
		436846390673952768	446368210367946753		443074870637629440	461581443085631488		453329423442644994
		436846634052239360	446368386922987520		443074981002743808	461613768326529024		453329535874768897
		436847315463438336	446368959185440768		443077565725413377	461616506917249024		453332870128349184
		436852991992537088	446373704394477568		443083214585085952	461617297791401985		453338897183825920
		436867685637697537	446374163364577280		443097233307627520	461618610612748289		453344251208675328
		436869003215380480	446378514543964160		443097509754183680	461618737649844224		453345292562100225
		436870066169479168	446384525636300800		443098232689016832			453345982475157505
		436873665620500480	446386572070768640		443098902695133185			453347509017264128
		436880667561836544	446401009884364800		443115183402389504			453347786722140161
		436880710394077184	446418035495018496		443149170392580096			453354831072096257
		436880842988589057	446418605345746944		443176370877636608			453354931165364224
		436881068764184576	446420719207866368		443176834910670848			453354993215889408
		436881602678104064	446469030585458688		443176839456911360			453355098794491904
		436882349415227392	446481052358283265		443179667244470272			453355182660014080
		436883957582671872	446485147391520769		443181006124634112			453355266806136832
		436884660598358016	446790134751444992		443182297299562498			453355621824614400
		436889907286392832	447031293574778881		443187579727654913			453357695832047617
		436892920386711552	447093388492673024		443215933713035267			453359327105925120
		436894896817831937	447094506693738496		443229417335033856			453360386444521472
		436895531588411392	447096072272216064		443237562316902400			453394952672661504
		436897589276192769	447102734617960448		443241295855620097			453430372311629824
		436899923997388800	447127669482606592		443241480048488448			453437598300930048
		436900206907772928	447136078021943297		443241652035911681			453526994073186304
		436904759338209280	447151076613971968		443242344037367808			453532239482347520
		436906262891360256	447183493320024064		443242709504249856			453533182659690496
		436906491053084672	447185715168681985		443243489212379136			453553863145308160
		436907769124630528	447191122360950784		443260878402514944			453563716659736577
		436908704265687040	447204929048821760		443281270672719872			453599384270536705
		436909040841793536	447434939911634944		443291067321167872			453601310320128000
		436910089128009728	447452485280464896		443314888078004224			453619684877676547
		436914147176230913	447481951243366400		443323813661376512			453621371785211904
		436917389071224832	447486900128190464		443351092169277441			453628452147830784
		436919460898021376	447530213635674112		443352555243184128			453638037344247808
		436919684219535361	447530244795146240		443360549267865600			453640787842981890
		436921902532411392	447535192690151424		443361426514931712			453664417754779648
		436924885546594304	447571534614233088		443365473921421312			453666445814030336
		436925576453296128	447724249177161728		443366968402276353			453673376028962817
		436926002670084096	447788025112961024		443372529348919296			453675790006501376
		436927909656530944	447788272245571584		443373016681304064			453678500046991360
		436932689221136384	447788460322328577		443374892122382336			453684422228074496
		436934176722276352	447789061559054336		443378403493048320			453685381008216064
		436940935616671744	447801428372094976		443378742153732096			453696031352713216
		436943624828616704	447814040858152960		443382684195098625			453706885364219904
		436943675470643200	447814267912609792		443382750007922688			453711768582225920
		436943979959967744	447814523454767104		443383125419503616			453719038087409664
		436944175569727488	447835814379409408		443383915789946880			453723545328029696
		436948140810571776	447848268694044673		443419249894121472			453755314639089664
		436949220810309633	448065831659118592		443419587045249024			453793524778274816
		436949266293354496	448082112638640128		443425223933980672			453793809512820736
		436955499423342593	448251623912251392		443432505220157440			453794418123096064
		436959355762933760	448261240964796416		443434577861046273			453794556019240960
		436959621656629248	448469571234971649		443440665427341313			453794891814805504
		436959691487592448	448470714241150977		443442489614008320			453796305220149248
		436970997947056128	448472135175254016		443459674550308864			453844567398572033
		436976004712919040	448473269851922432		443459679469842432			453855763325517824
		436976315434946560	448558185776160769		443459689729499136			453887945188339712
		436977512887750656	448800466655531008		443459704455700480			453889731081019392
		436978116964392960	448800658758840320		443463479245041665			453908705139257344
		436978283565957121	448800799205105664		443466852204032001			453913794021179393
		436980790946058240	448800884466913281		443468751636152320			453986027599048704
		436983573682212864	448819474888933376		443470065019924480			453989072654958592
		436983893049507840	448819628979261440		443471223180509185			453990769771028480
		436984100181000192	448890242171666433		443471898467262464			454004516887613440
		437002788846202883	448892022163013632		443473378410643456			454007310659371008
		437006790090571776	449142113989849088		443473554068099072			454036503568478208
		437017483669929984	449142310413303808		443481630863544320			454046078912843776
		437028072173215744	449182950966710272		443483139818946560			454046175918702592
		437029758707453952	449194602340548608		443487539999952896			454046232139141120
		437031143180099584	449197382589480961		443492086700994560			454080450428817408
		437038825190092800	449228630313693184		443492868858994688			454089367795937280
		437045915292278784	449233268211081216		443498803572645889			454089777814724608
		437061786597351424	449234986387116032		443509073787375616			454092325933694976
		437062346335195136	449235103416213504		443509474188206080			454093799732428800
		437065848415473664	449250419366060032		443509548486127616			454100153713303552
		437084716530143234	449250822493184000		443515417391534081			454142635955851264
		437084763040800768	449290922971238400		443521848270417920			454153468333137920
		437086769558081536	449303266870833152		443523875549503488			454166229255983104
		437090942999601152	449312569849683968		443529849588944896			454171151758295040
		437108266334580736	449323528379064320		443543217364291585			454206318099070976
		437108278602915840	449348992631988225		443548183860629504			454243223771553792
		437108679666462723	449368620129202176		443548275803574272			454261725337235456
		437114981453004801	449514802000699392		443548356778799106			454327649968455681
		437115206045417472	449514929931165696		443548420767088641			454331741864747009
		437115612246990848	449515299201875969		443548828881653760			454355867136049152
		437115614822285312	449525829673177088		443549474921537536			454359351373750272
		437116154218164225	449552987674144768		443553066831208448			454363234905387009
		437116579864514560	449553059187023872		443557119103873024			454434277082804224
		437120115666984960	449553760936026112		443557935663157248			454446974511480832
		437120992662781953	449553899218014209		443561170247884800			454454593364447232
		437123848207884288	449554405881569280		443562982241763328			454463833382596609
		437124428372402176	449555253076459520		443564543877210112			454469545063768064
		437124865464623104	449557374488285184		443567639479480320			454470539583565824
		437128066981462016	449564642873204736		443570934813708288			454471304804962304
		437129211124649984	449568576849334272		443574773482668032			454472327518904320
		437132637505720321	449568865358725120		443580337806143488			454474027357458433
		437133586857074688	449569558345838592		443580939290312705			454486172723847171
		437136211342159873	449570184588980224		443581764653821952			454490947179802624
		437142778447806464	449574369447387136		443582002931830784			454492848612990976
		437156434846171136	449579649958703104		443585341933768704			454517632012935168
		437157607632285696	449588559574753281		443587612595339264			454560685171552256
		437162317571424256	449603261163921408		443592982688976896			454596475079901184
		437175453179461632	449609938558783488		443605617622523904			454659614022586368
		437209535171006464	449617280046235648		443610850855645184			454689692135747584
		437209858551873536	449627342558597120		443611410791034880			454710407140093953
		437238686963355648	449628216823529472		443611989042921472			454712561213399040
		437250665262620672	449628283487784961		443612808131792897			454714972883681280
		437254835566833664	449628390153134080		443630787800219648			454715853422854144
		437255100709740545	449628813438119936		443691377877327872			454747383294066688
		437255160499568640	449629341601632257		443714723901882369			454772307039244288
		437255267181666304	449629393158037504		443719899190689792			454801326094811137
		437255404813574145	449629892989034496		443749857803911168			454804062408437760
		437256376914411520	449630452497006593		443751311855869952			454804126116110336
		437258815176601601	449640194988584960		443786909215490048			454807459618504704
		437259020189958144	449927069636374528		443786927771119616			454810654525120513
		437259170513829889	449928242892251136		443787918872543232			454815085542641665
		437263044549148674	450354424708595712		443790311265800192			454832480151826433
		437263450881155072	450584747023273984		443793375611744256			454874399414304768
		437264932678426625	450659331303026688		443793462006001664			454898339281371136
		437265014458966016	450659520474542080		443796777419157504			454994947322949632
		437265135527550977	450660198571835392		443797658847948801			454994994945093632
		437272077801103361	450681256985251840		443798228782571520			455005507107827712
		437275129807376385	450681384223637505		443798495242498049			455009100473331712
		437286747916230656	450684799452459008		443798564129357824			455010270591844353
		437294156474753024	450684886991781888		443799227618312192			455028856521785344
		437302164307062784	450691718870863872		443799987965530112			455037811423719424
		437310412733026304	450699834102923264		443803969140174848			455046741558317057
		437313059343056896	450705014038994944		443811259759075328			455050342900580352
		437316263267008513	450706179459940352		443814093464424448			455050470068080640
		437316922955558912			443830143040368640			455070892603613184
		437317099850317824			443830575938682880			455075963697504257
		437325148958384128			443831699815006208			455077278725074944
		437333351343861760			443831719267807232			455077891714592770
		437333499813842945			443832552919683072			455080263845158912
		437354234259189760			443838238180904960			455081163498209280
		437354290479632385			443844214200082432			455089385772302336
		437355213897601024			443844214221066240			455108750752223232
		437355671919808512			443844214376239104			455118242407673856
		437360715104808960			443844570829160448			455141808813916160
		437361184703279104			443844966045863936			455155424376156160
		437362840866160641			443845361816600577			455252768060874752
		437363918923923456			443847595991920641			455322695027400704
		437367845148975104			443847664296534016			455368302957981696
		437378064335785984			443848588800823296			455376749153382400
		437382262309814273			443848729788186625			455402765565853697
		437385890915434496			443850134980665345			455404821118738432
		437386794808926208			443852176902074368			455408638404751361
		437387127845052416			443855026570555392			455414411696824322
		437398117093101569			443858979160997888			455414519565910016
		437398373050896384			443862818967011328			455426600738107392
		437398721966264320			443862837308719104			455464446841090049
		437398951893811200			443864510273572864			455484632864018432
		437402186801508352			443866629009461248			455486156944068608
		437404898720612352			443866979288367104			455487288899031040
		437405386128523264			443875059401502721			455487619724738560
		437405434245562369			443876748082438144			455494909613465602
		437405680681496577			443877052802805760			455495616706392064
		437405956339933185			443877994307006464			455496162343006208
		437406212364460032			443881490129354754			455498693173444608
		437407073455046656			443892304718602240			455500248454930432
		437408390722363392			443901544665460737			455501296334680064
		437409983722844160			443901889633980416			455507595391156224
		437410879491956736			443922180586209280			455519818767028224
		437411660098064384			443922883950411776			455522381029982208
		437413780642074624			443922918956085249			455522430963175424
		437417753125736448			443923535908851712			455522872283242497
		437417865700851713			443924377768558593			455522908560171008
		437423583430991872			443924687253286912			455523017850757120
		437425238549475328			443926428787032064			455523152940912641
		437425992714305536			443926443399970817			455523492222750721
		437428536799150080			443930623242022912			455523497973129216
		437428635150979072			443931371929485313			455523662893154304
		437450090824105984			443933171868913664			455523929470550016
		437461698895556608			443935807913488384			455524144373706752
		437462605096304640			443936559469830144			455525232128696321
		437468153812373504			443936920943329280			455525907621752833
		437472416387055616			443939647237132289			455525951204765696
		437489788686716928			443943786700214272			455527044756299777
		437526841092759552			443949071456165888			455528444407713792
		437534739667619841			443949746743300096			455528736423550976
		437553513724669954			443950460689739776			455529416446476288
		437559193005207552			443967832695377921			455531890939023361
		437560888057663488			444048105965903872			455534717022904320
		437561286466228224			444049426043400192			455549684686553089
		437561502724521985			444093185963618304			455554555736907776
		437561765044703234			444093425927725056			455561664662740993
		437562354973540352			444095935958638592			455583512540618752
		437562741721923584			444124853784686592			455583751637311488
		437563399510437888			444167516961513472			455587141146259457
		437564264430456832			444168682919690240			455703316186820608
		437564661450698752			444169011375251456			455715231420141569
		437564857169481728			444170112346517504			455715546982789120
		437565088011390976			444188558325473280			455722522580107265
		437565276255944705			444190531577733122			455739775144976384
		437565627432460289			444195786092335104			455744992527798272
		437566934805393408			444199622182195200			455771695568404480
		437568394104041472			444208989321322496			455782126118785024
		437568458192982016			444210190842224641			455783172806946816
		437568829150220290			444224603582246912			455801837095231488
		437569916905218049			444244280190582785			455807734818934784
		437570692532301824			444254758895763456			455829302223704064
		437571679976316928			444257539358605312			455839390267621376
		437572313089728512			444258800032165889			455842499496394752
		437572423806750720			444262392487092224			455847282660110336
		437573973451087873			444265788292472832			455847375324467200
		437574080661700608			444266137959018496			455847841353965568
		437574122155945985			444279879740448768			455847909846958080
		437574280851619840			444291572683636736			455848612262846464
		437574478978375680			444293313332379649			455849051108278272
		437574505519906816			444293938556334080			455849471763431426
		437574793378795520			444300006959222784			455849662373978113
		437575035557916672			444307711648620544			455849769412595712
		437575527432331264			444311260520538112			455850339431108609
		437580691283275776			444327848950501376			455853202601435136
		437580998730330112			444336314918645760			455853277994045441
		437581855152693248			444338693998796800			455853595162705920
		437582870857912320			444365171872780288			455856413768552448
		437585245618331648			444394877816954880			455856926450925568
		437588831060385792			444435292175351808			455857180122836993
		437589509489061888			444439031640625153			455858268221734913
		437590390514782208			444444992858521600			455860526979883008
		437591084508930048			444465414333276160			455860660367155200
		437594426911621123			444466569632940032			455860965410492416
		437595733827792896			444466754379866113			455861613237899265
		437596213572288512			444466842103730176			455862534604857344
		437596403842678784			444467358258982912			455863419166404609
		437598712530219008			444469757430226944			455863487839735809
		437600471982030848			444485108204990464			455864540056395776
		437601951166263296			444499171857297408			455865133948878848
		437604776814317568			444501658069114880			455867025101824001
		437617715961147392			444502107404910592			455868524905631744
		437621221707243520			444502520703246336			455868593037516800
		437623635826987008			444507839592431617			455877805407223808
		437626638608506881			444509948727156737			455878058772561920
		437628921555984384			444517343113531392			455881549926658048
		437629843342393345			444518611034853376			455885835032735744
		437631450566111232			444518773664395264			455886246116462592
		437634099357155329			444519418282799106			455886300386570240
		437637713626673153			444520425456795648			455888169305919488
		437639121851678721			444521078337978368			455892981221171200
		437642042622357504			444528078899773440			455895501229924352
		437642184880570369			444536669698416640			455896634639929344
		437642470848200705			444539301074718720			455901007147315200
		437644803409715201			444548919008428032			455903633976991744
		437645867575959552			444551648388870144			455905044693794816
		437653460860014593			444552881643868160			455906571927568384
		437653484595605504			444559628576497665			455908373276688384
		437654308742791168			444562435903873024			455910302039941122
		437656611637952513			444573285561671680			455910841632559104
		437657669231325184			444574508536459264			455911440306946048
		437665112703635456			444575798045859840			455913048755429376
		437697330318680064			444577042349056000			455914546566557697
		437697404310401025			444577183906807808			455916154268442624
		437697435209838592			444587793860153344			455918159715770368
		437697483607932928			444587876349538305			455919483459092481
		437699888454053888			444588547220070401			455919513393827840
		437703226692206592			444599160566980609			455924225312690176
		437703275622989824			444600173625638913			455927359376748544
		437703371131486208			444600845527556096			455934425696460800
		437706779175424000			444600856596709377			455936462777630720
		437708369840050176			444600911143657472			455937998786293760
		437711334336397312			444601676583153664			455939138014171136
		437711393199255552			444601845714255873			455947590321057792
		437711438388662272			444602624910692352			455949570191925248
		437712123209474048			444602917685698560			455954005093388289
		437714074294439936			444609639636668416			455957782127468544
		437725395715358720			444613543321956352			455969419995648001
		437728016886951936			444614791605145600			455972778504888320
		437728290594619392			444615383530491904			455973526961283072
		437728359347675136			444617433282650112			455979296759087104
		437731107577278464			444619008919470080			455995317411119104
		437733744674611200			444619364428697600			455997017509363712
		437734445467336705			444619410075312128			456000474085609472
		437734459723743232			444620228710768640			456000489084428288
		437744307026423808			444620527014260736			456006096852111360
		437746002389630976			444625367656321024			456006399454347264
		437756798611640321			444626126715887616			456009937219747840
		437760884069642241			444629731091050497			456010067863937025
		437760992605650944			444631936300904448			456010170884456448
		437764933246144512			444642871631970305			456010550909362177
		437768278413688833			444643321730703360			456011717781487616
		437783352620638208			444648699596001280			456012210389913600
		437786658403258368			444657778355757056			456012253964541952
		437788025201115136			444658067611725824			456017080606003200
		437788441993314304			444660457232936961			456025506799185921
		437788900312895488			444668552188928000			456026858451398656
		437789722535297024			444669021070184449			456029204631797761
		437792986353897472			444672132564279296			456033119322529792
		437799153771745280			444672224889688064			456034955358113792
		437804900659892224			444672605090750464			456038769628442624
		437806219580149760			444672883865182208			456040443151941632
		437820498131431424			444672937992671233			456040514304110592
		437825102432849920			444673426519638018			456042241279008768
		437827091355009024			444683669953716225			456048612938891265
		437827225358848000			444686048468422656			456048836960866304
		437832290043826176			444687623253409792			456049717643075584
		437840795367112704			444687635165249536			456051611186769920
		437854535990538240			444689800381992960			456053634154135552
		437860914193522688			444689827267489793			456059320078057472
		437867571975426048			444695545324376064			456059559929737216
		437867708701356032			444695769275060224			456063021446492160
		437893576480268289			444696147748061184			456063062189953025
		437895099658539008			444696477378424832			456063672633532416
		437895289048166400			444698056391282688			456064477289406464
		437895613385293824			444699416885084160			456064555324436480
		437899079608463360			444699792694730753			456064772216078336
		437909983838347264			444700108454510592			456073261302808576
		437911845413081088			444702635342319616			456083285660426240
		437914158496247808			444703079384879104			456089739507294208
		437915372743045121			444703525134553091			456091705956384768
		437919337287262208			444704327111049216			456091959757901824
		437919557945421824			444704734889660416			456092484108845057
		437922341407174656			444704761905160192			456094331502612480
		437925958411386880			444704791475007488			456094607697526785
		437929606642167808			444705878097551360			456099560927293440
		437941940735471616			444706187096125440			456106355871727616
		437954510544068608			444708780861698049			456110434211209216
		437954565829165056			444712084354260992			456117747584204800
		437965583205019648			444712406267092992			456125085166743552
		437976211210657792			444721148534988800			456130435454881793
		437976476294856704			444721364659085312			456130699586572288
		437976589243252736			444724247156363265			456137960207822848
		437978096458035201			444726219947249665			456142807023890432
		437978231681978368			444728267598073856			456142849047035904
		437991775702380544			444730614399262720			456144080649469952
		437999971305267201			444738860056989696			456151913772232705
		437999985259728896			444738948401610752			456153392243421184
		438000039713980416			444741900361150465			456154699159195648
		438001357619232768			444744648376852480			456156657966264321
		438001516956631040			444744821622591488			456156711103913984
		438001966669910016			444749743130816512			456157062930518017
		438009833728782336			444751742618861568			456158478478745600
		438009987307417600			444753175283630080			456163451812192256
		438011669927956480			444754141768740864			456170973658902528
		438012914814156800			444771506799656962			456178326705418240
		438015849543503873			444795261756653568			456178591261130754
		438019157129699328			444795295441108993			456181886339907584
		438025550494720001			444796794963501057			456183175899652096
		438033363103145986			444829210238935041			456184364863217664
		438034215507333120			444844144989851648			456204388696981504
		438034251410604032			444847606699933696			456215537488363520
		438039734766800896			444861879257554945			456216551218114560
		438041548597760001			444879666122616834			456231827531763712
		438041971408785408			444883888163143680			456236442470334464
		438042226284044288			444886433606926336			456236716790013952
		438044599098310656			444887560863485952			456238585415729152
		438044967811162113			444903720737075202			456239128037036033
		438045084232470528			444905184280723456			456240270791561216
		438047626525954048			444908802022719488			456242975970848768
		438047793006272512			444908802500870144			456243261170909184
		438049740866211840			444914891623649280			456247499938750464
		438051603531448320			444917302241144834			456249486311186432
		438053830060937217			444917829712637953			456255409460748288
		438054288850702336			444922375331536896			456266531253399552
		438061229811453952			444929466544836608			456269552817410048
		438062187358466048			444930507080343554			456276516301598720
		438063834126090242			444934447604191232			456284240003747840
		438064656088072192			444938467647438848			456292358020030464
		438066541729693696			444938616318750720			456293020732645376
		438067707981070337			444941282981326848			456302431538671617
		438073222047608832			444943940270444544			456302792957636608
		438074675059752960			444950198494572544			456343407833530368
		438077824780341248			444952573666013184			456351711905742848
		438079469731848192			444974734397014016			456357091888750592
		438082095173222400			444974734397022208			456384732712796160
		438083557727416320			444976490938003456			456385100020600832
		438083832248414208			444978390596993024			456425393432444928
		438084864873467905			444978567089115136			456440314278842369
		438091346251771904			444979139846864896			456440854698524672
		438091400723189761			444979961427144704			456443083606228993
		438092104653615104			444982728547909632			456451771125092352
		438096449482403840			444985216910643200			456473155646005248
		438099674512494594			444993125225091072			456473733700386816
		438106886412324864			444993522467221504			456496454790811648
		438115589098201090			445005265981956096			456499808325222400
		438118398854066176			445006378470354944			456501527813709824
		438123817295024128			445007260113072128			456507039821221888
		438125302821048320			445009376776962048			456545104900009985
		438130972266360832			445013583689043968			456548575602700288
		438133017047875584			445013848568107010			456557297800458242
		438139507234189312			445014917809045504			456572330349580288
		438139734410272768			445014923500716033			456582432569839617
		438157478355009536			445016194555183105			456584093585530882
		438164984694972416			445016574798200832			456584538420830208
		438221499565363200			445017778169204736			456594252248522752
		438247561737289729			445019745964658688			456599982494060544
		438247582616129536			445019777249980416			456601918421217280
		438266511179153408			445022156364455936			456602084574367744
		438286055914373120			445022536137322497			456617905430355968
		438286381866295296			445028030226788352			456621295845666816
		438288869348622336			445029137246593024			456631721102807042
		438295039710887936			445032702270386176			456716134931120128
		438303434664853504			445041867080470528			456743834844954625
		438325685703417857			445045683566149632			456749099547910144
		438332704971849728			445047918446125057			456765193226158082
		438337902448492544			445047961458716672			456786962624839680
		438351352092450816			445049154322956288			456797675568910336
		438352073185591296			445050023324045312			456834908648783873
		438353452172050432			445069338177839104			456838002040659968
		438355259405369344			445071645104156672			456838669865738240
		438356173109346304			445078852574773248			456850619609788416
		438363677390274560			445079969597640704			456851528855588864
		438364495858376704			445083799592787968			456851577882832897
		438364501659115520			445085314822856704			456859584914006016
		438366036271038464			445087143073828864			456862679249195008
		438366173139587072			445088670387671040			456864544678481922
		438369749496786944			445089447848071168			456867516917104640
		438370122680782848			445108772982099969			456873547898433536
		438370124564021249			445108831450714112			456886329750876160
		438372882847391744			445109637990207488			456889131340013569
		438373689223311360			445132003998834688			456900199072296960
		438374890333540353			445132082109353984			456902703315451904
		438375446435352576			445132890926374913			456903839518830593
		438375764661379072			445135040259702784			456916499589251073
		438375788220805120			445141049921396736			456919679249154048
		438375943762378752			445171775433760768			456928039528439810
		438376700129599489			445172456374796288			456938999962423296
		438378394473230337			445173203540123648			456939014181122048
		438378457576505344			445173751236153345			456939032841555970
		438378694974124032			445180298608013313			456939036402532352
		438378738351607809			445185532708913152			456939054177996800
		438378756043194369			445185619614904320			456940907255062528
		438378874771345408			445185648865988608			456943601193615360
		438378936075292672			445185680524587008			456950529290428417
		438379254754344960			445198005348884480			456957158064930816
		438379849057857537			445206001957236737			456962999971246080
		438379858918641664			445223370724896768			456963623303135232
		438380088082829312			445223581371211776			456977941952352256
		438380169448140800			445226291844100096			456989874420465664
		438380223563046912			445227721698705408			456990890058612736
		438380346569416705			445233456705183744			456992078262972416
		438380458611867648			445233498501435392			456995730356699137
		438380520456859649			445237498701025280			457000494662029313
		438380975316557824			445240086104268801			457003097756168192
		438381010531934208			445242762926235648			457008161493245952
		438381286387101696			445246520817094656			457013064991535104
		438381311699738624			445248093458399232			457020789293060096
		438381882330591232			445248170428092417			457028772466659328
		438382373873651712			445249128109707265			457114331423846400
		438382531034247170			445254359702843392			457122778810822656
		438382965165285376			445259900361273344			457122811975184384
		438383179809189888			445261068613742592			457142097972580353
		438383683196944384			445263449619062785			457144075125534720
		438384039167541248			445263767476383744			457150661751496705
		438384513916600320			445264509360672769			457152914369171456
		438384619285921792			445269568768839680			457157060296445952
		438384625048498176			445270133150580736			457166645166080000
		438385009435885568			445271186742988800			457170898936537088
		438386665007382532			445271626255306752			457170917924163585
		438387144542138368			445271718173900800			457170968826236928
		438387647921532928			445272112585265152			457173474113376257
		438387915253891073			445272503213363200			457187765000888322
		438388751237382144			445272511690051584			457189909724286977
		438388762692026368			445272797590609920			457191028676886528
		438388924508303361			445274080825319424			457191519158427650
		438389088110915584			445274249591549954			457192528954269696
		438389750962327552			445276185845833728			457198027825229825
		438390071621070849			445276617590706176			457203227247640576
		438391860785319938			445278129637306368			457209104952328192
		438392667417092096			445278927439679489			457219353042116609
		438392967104315392			445280035550023680			457222456827469824
		438393143164420096			445290852022484992			457228190021615616
		438395004000927745			445292569430605824			457228337350717440
		438396517310017536			445297207080939520			457228369399394304
		438397185915633666			445298126962696192			457228393944064000
		438399337568415744			445298573651890176			457229811287871488
		438400772040970241			445298961881260032			457231006534475778
		438401974128877568			445301209230872576			457231386500681728
		438402236268699649			445301886569443328			457234072805179393
		438403179597033472			445306129938411520			457241084452950018
		438403244143165440			445306714993463296			457241783575932928
		438404932262440960			445318955620503553			457241831063814144
		438405100395319296			445320773797171200			457245179804516352
		438405118774751234			445321836046589952			457249551347224576
		438407504763293696			445321855743045632			457251470379720704
		438407655624024064			445322254281613312			457253751540416512
		438409031150231552			445323518386114560			457267949758595072
		438409484755795968			445324987713732608			457283080974135296
		438410313541488640			445325580691841024			457286855231541248
		438410871107497984			445325727626690560			457297223286390784
		438411809893416960			445325962134425600			457306774937546752
		438411897101369345			445326246327492608			457307871639011329
		438412206934605824			445328212688531456			457311236380954624
		438412551198494720			445328610250219520			457315803277586432
		438412785408806912			445328799602053121			457320356114857984
		438413163240112129			445328893114056704			457321017007149059
		438413171183726592			445331578713960449			457322308903116800
		438413297499791360			445332563570458624			457324501915533312
		438413402344796160			445332675239641088			457324880099545088
		438416211542818816			445332816839323648			457331034367856642
		438416919356375040			445332871868207104			457331102206554112
		438417241689063424			445335680458436608			457332927915773953
		438417892183638017			445337111994961921			457333843813363712
		438422956956721152			445337153447682048			457341955228585984
		438423677810778113			445339294950248448			457343894687326208
		438426328727961600			445343200010850304			457350995811381248
		438426456407154688			445345437034487808			457354155405750273
		438429401252777984			445351173848305664			457354978467012608
		438431015347171329			445352892086894592			457365126531018752
		438431825849876480			445364966762479618			457371482768031744
		438433489713913856			445367011452141568			457402686825320448
		438436189792894976			445367672239575041			457425215069642752
		438436868414521344			445372241271083009			457429378159607808
		438437427842404352			445372321738817538			457439305913597952
		438492787915632640			445380438916628481			457479003910045697
		438495798574465026			445380559833792512			457493050357329920
		438513156705361921			445380683176091648			457499300130344960
		438515100597506048			445381650587717632			457519587970785280
		438573586937565185			445382111592067072			457546370329899009
		438595592785502208			445382262150791168			457567188724232192
		438619373583216640			445382735650369536			457572649292410880
		438619692102860800			445383095819042816			457578321870852097
		438619766463672320			445383304213446657			457583594488487938
		438619806234054656			445383392302235648			457583757516898304
		438620356841320448			445383402141675520			457586979887394816
		438620642729271296			445383459683721216			457592864814686208
		438621420613271552			445383535868661760			457596587691479040
		438621946419617792			445383707005059072			457596668020789248
		438622519550283776			445383735920566272			457601000749412352
		438622624416276480			445384002892218368			457625622194311168
		438622994395848704			445384410968633344			457633989747277824
		438623071985876992			445384659065503745			457634668351737856
		438623402891685888			445384703328387072			457635244410425344
		438623559452491776			445385570542714880			457663021004128256
		438623571603386368			445385659524849664			457663116500041728
		438623609893158913			445385839493672962			457663132153171968
		438623992719867904			445386494845657089			457666014847578112
		438624077889429504			445386733686124544			457675518603956225
		438624118372835328			445387339582689280			457676998203412481
		438624657496092672			445391813055348736			457677165341859840
		438624695039307777			445392084506140672			457685166576504834
		438625065245351936			445392660942323712			457685761492410368
		438625099819008000			445392985006424065			457686507285786624
		438625133390204928			445396730956107776			457692322835091457
		438627192227250176			445402123170484224			457693926728933376
		438629085456384001			445403794533515264			457705453963595777
		438634174136999936			445404685672124416			457707074957623296
		438636081861644288			445408652824834048			457713098951249921
		438636396853870592			445411448878297088			457714641716928513
		438636603956031488			445416904866295809			457715583165792256
		438638420773322752			445421291030319104			457720460298690560
		438655915534086145			445421756212211712			457730962739433472
		438656008102359040			445426717142691840			457731404692860928
		438656119591165953			445432348994457601			457748301182296064
		438656442841972736			445432790591754240			457759620665073665
		438657536854851584			445432897479385088			457761664751112192
		438658157385355264			445440128161304576			457762071774781440
		438659466675101698			445443337030762496			457763844417282049
		438659522484523008			445444389603528704			457764067340718080
		438660738178355200			445444612765646849			457765016012218368
		438661180446756864			445444878663970816			457769068016455680
		438661506864263168			445448305011466241			457770394829979648
		438661766227431424			445449580813877248			457776182558482432
		438661881533042688			445451977342717952			457776737829814272
		438661930744815616			445452351521177600			457785040756154368
		438662758796910592			445453329641275392			457786028422467584
		438662760889851904			445453417272856576			457793142084087808
		438663179137482752			445472880642371585			457793202100387841
		438663444280389632			445477877497098240			457804190929014784
		438664420915683328			445510520154914817			457804672779038720
		438664716874153985			445524801772605440			457805941576970240
		438665756642115584			445536039919038464			457809163100631040
		438670588081872896			445550418337071106			457817933453201408
		438674701133815808			445551953016127488			457823968851144704
		438676727481786368			445559155320188928			457824027403620352
		438677431512465408			445559641091891200			457831595605360640
		438678235979993089			445560115790630912			457853982107787264
		438679563670151168			445567168315273216			457884493739995137
		438680282204766208			445567216100974594			457887822830391297
		438683818594414593			445575360089194496			457890453598502912
		438689722840653824			445575420600418304			457893988687953923
		438690104605827072			445577048300732417			457909814891278336
		438698533630521344			445577183550246912			457915576288292864
		438702765809098752			445580411037827072			457923002475487232
		438703988117344256			445581917807575040			457923112336490496
		438704771449757696			445583566463062016			457937271447371776
		438704844518748160			445583761363595264			457944214312337408
		438705308396187648			445585313113853952			457944653351116800
		438705366155931648			445585334907056128			457945453754335232
		438707370752217088			445587199472324608			457948698916687873
		438710915387510785			445588126040223744			457949575807258624
		438715455285768192			445592867323392000			457949931089575936
		438715689403047938			445595690060615680			457950359399698432
		438716061995655169			445596020898951168			457952674349338624
		438716521087381506			445597255039336448			457953757729267712
		438718252882362368			445597360215711744			457953988605128704
		438719912392286208			445597407192297472			457954650423975936
		438720639323889664			445598168130920449			457957257297534976
		438722266705444864			445602218301878272			457959055940943872
		438723208595136512			445602425878368256			457959381058224128
		438723960801591296			445603589743190018			457961321925836800
		438724652706594818			445605945809571840			457964937021628416
		438726744434962432			445608568138768385			457965793360089088
		438726836596781057			445608839208259584			457967406602678272
		438727053635239936			445610372637016064			457973425026633728
		438727708080881664			445611201473429504			457976613964353536
		438728070053515264			445611262479577088			457984422235877376
		438731792225677313			445611337419599873			457988817493172224
		438732856987504641			445615065006637056			457994223988801536
		438733009509175297			445615735352856576			458016990469177344
		438733405963169792			445618956649263104			458024438181548032
		438733608355102720			445621129571336192			458025808473255937
		438737556164055040			445621179798147073			458025851951398912
		438747745642635264			445621828929994752			458025877297573889
		438748769753264128			445622527495122944			458033178754973696
		438753250301718529			445627532847484928			458033194520961024
		438753292580298752			445630557670490112			458033268063887360
		438753405495181312			445631315870638080			458033295302086656
		438754304699408384			445632379852300289			458033438218403840
		438757354134573058			445632603937202176			458033454819467265
		438757372493066240			445632740847677440			458033779114643457
		438758042839298048			445632798896836608			458033891626844161
		438758441432408064			445633712248467456			458033947813740544
		438759112554577921			445636879551983616			458034051321176064
		438759676940128256			445638630220906496			458034188763942912
		438760625809129472			445640752060985344			458035034910240768
		438761097915801600			445641075462377472			458035088656457728
		438762946555305984			445642900727009280			458036166554435584
		438763765564448768			445645342101352448			458039490603659264
		438769298497343488			445646611868573696			458048627085021184
		438770853442883585			445646965288624128			458055213119598592
		438771969476296705			445647046536863744			458066988388990976
		438773270494863360			445647170171977729			458071146764972032
		438775827514544128			445648403066671105			458071521466920961
		438775893377314816			445648681329754112			458075432554733568
		438776449408172032			445650855048396800			458078296614240256
		438777211953225728			445653756399476736			458084227154984960
		438778454717526016			445654774202261504			458089887472709632
		438779138762366976			445655238981070849			458091022149353472
		438781171829583872			445659379413426176			458109538571255809
		438782379155804160			445659829319639040			458112266177904640
		438783253248364545			445661846964408320			458151085577084928
		438790134339608576			445661939751202816			458162473313796096
		438790506991341569			445664489099120640			458175465434644480
		438790749715300352			445665625567166464			458201697463336961
		438790877033418752			445666263562321920			458212659612368896
		438791797674741760			445677030450143235			458214141262831616
		438799903230550016			445678724613017600			458216652572614656
		438800194000269312			445684145612541952			458229473855700992
		438800623765843968			445688998208364545			458229502007848960
		438801040486719488			445689156526559233			458229545699901440
		438801182623281152			445689278656307200			458229599714177024
		438802154862546944			445690552294445057			458230323210231808
		438802324195409920			445692941672411136			458230354005196801
		438802383561191424			445706153981665280			458230374179409921
		438803186452033537			445707006666493952			458230570393145344
		438803409454772224			445711697912012800			458231440895791104
		438804191990251520			445716630438293504			458231938424508416
		438804387314827264			445717113433755648			458232722545057793
		438805565385736192			445725962790256641			458236290236809216
		438807141080891392			445727256699469824			458244835934105600
		438809657558466561			445731089924235264			458246118447775744
		438814357041201152			445732378942898176			458248009906520064
		438815320003076096			445733211100811264			458254265522204672
		438816667565830145			445733300326641664			458256596498644992
		438817023905521664			445734971630952448			458256999655161856
		438817498482614272			445735118305759232			458264674392625152
		438817587674509312			445735276682702848			458264820870303746
		438817780457304064			445735699271409664			458264845612486656
		438817964432064512			445735995355320321			458264886951546880
		438819468668440576			445737120481939457			458264920908627968
		438819505893281792			445738269989277696			458264960964231168
		438822201807368192			445738454241251328			458264995189780480
		438822999396204544			445741481165193216			458265115067174912
		438826324661387264			445742931669176320			458265125645189120
		438829898040229888			445745271306059777			458265141780680704
		438832151329382400			445745553817600000			458265183228796929
		438832782694162432			445748146292129792			458265215453630464
		438833830850347008			445755091388481536			458265613996417024
		438833856846626816			445755873005019136			458265648674897923
		438833962040180737			445758820258553857			458265691008024576
		438836668133416960			445760684920676353			458265738051342337
		438858804248080387			445761911863275520			458265925817737219
		438858851152973824			445767851530395648			458266218609512448
		438858900419268608			445768275709136896			458270897443708928
		438860816234733568			445768715531849729			458274075110940672
		438881511014948864			445773343216914432			458274674011803648
		438881602362679297			445776559400443904			458274808896454657
		438892369924993024			445785942796668928			458277458559504385
		438893831808122880			445789276111110144			458292473039556609
		438899443702562816			445804332441550849			458293692600557568
		438899476804038656			445883092193280000			458294040749170688
		438901193117401088			445884362585042944			458301241710637056
		438901649105383424			445886869335965696			458307840927473664
		438902228125233152			445886948927082496			458310380121751553
		438904403354214400			445908819151839232			458310444223315968
		438905047922278400			445909044470226945			458311133481664513
		438912451640569856			445910750637199361			458311165073162241
		438912722903003136			445912786107768832			458317865683546112
		438912748106547200			445913333561307136			458326875845033984
		438912784668323840			445915676369108992			458326928357744640
		438912845447987200			445917315499307008			458328079036071937
		438913277012484097			445917484260929536			458328206450634753
		438915537578774528			445933823100850177			458334238623145984
		438917828088180736			445948387167588353			458337869753765888
		438918007285620736			445952279217463296			458341879227355136
		438919730997784576			445952416643821568			458346711451451394
		438921791940349953			445959820383105024			458350065971920896
		438923984579866624			445963125754318848			458359192240152577
		438925942690680832			445964846644068352			458359698383974402
		438927554628419585			445967341730664448			458363828917776384
		438930967181660160			445968601812836352			458364863136669697
		438931643160875008			445978771129376768			458365807378984960
		438934251397214208			445981696799027201			458369319559122944
		438938050010578945			445982082075213824			458370831735734272
		438938356576034816			445990092218568704			458371057616162816
		438938870470963200			445991158561656832			458378044588429312
		438938929245741056			445995647423234048			458379253516496896
		438940093827403776			446389527813181441			458380617168990208
		438940790199296001			446724196862013440			458381628553715712
		438941681057280000			447167941793284097			458382756792127488
		438948787382681600			447412852262199296			458383235618467841
		438948864541077504			447458333159866368			458394558028865536
		438949410811437056			448559123790323714			458396172206346240
		438949944121380864			448587212775776257			458402201048584192
		438950703986671616			449208761287069697			458407697398767616
		438950996044431360			449332090489016320			458419862961139712
		438970964656025600			450418663058075649			458420132105035778
		438973665729069056			450694643991461888			458421560047861762
		438974147549732865			450694701331795968			458423754473762818
		438975600137891840			450695194078613504			458426406951997441
		438980715620081664			450695594991169536			458431309799755777
		438987420877725696			450701117589307392			458431980049534976
		438990235293474816			450701257054109696			458433191846477824
		438992645718036480						458433786934755328
		438992680019058688						458434462208892929
		438993040259424256						458436861938388992
		439009344513142784						458436967890309120
		439009492911796225						458445552544264192
		439014912791416832						458448329773703168
		439020755821817856						458452357706424321
		439057015248531456						458457067208982529
		439057609854038016						458458561056874497
		439057883737911296						458461444917698560
		439059427677974529						458465137842601984
		439062355989630976						458465162425798656
		439062564325298176						458467691968225280
		439062654540587008						458468898719797248
		439063205466603520						458469387888902145
		439064718247206912						458472276803846144
		439067702586777600						458473234325708801
		439068844158898176						458473277082451968
		439068876622802944						458475323022008320
		439069263941611521						458475620058402817
		439074450152370176						458480234002534400
		439075289617166336						458480748614270976
		439088025805787136						458480944601518080
		439089238072905728						458481971790757888
		439089396844093440						458484719672242177
		439090869120286721						458488546429784064
		439103462098604032						458497436785184769
		439106036923129857						458510069219729409
		439107476173385728						458514558538514432
		439111519477833728						458521692252667904
		439111580429463552						458522128187682816
		439116018838167552						458524133346000896
		439117079154020353						458524272093577216
		439117452241551360						458552422785634304
		439125707378401280						458569167583858688
		439127143776129024						458579086399799296
		439131860287750144						458582802770841600
		439133001520529408						458582840012054528
		439134382746775552						458591799133896704
		439134609712771072						458595267906764800
		439135369259651073						458596288288665600
		439136757272289280						458596424016351232
		439136831276593152						458606756466556928
		439138725076160512						458606796483989505
		439143498823262209						458608812774391808
		439149664433369088						458610092880195585
		439149693244047361						458615482535673856
		439149928724848640						458619624460787712
		439150989044899840						458627957175885824
		439155428451438593						458630359006334977
		439155859604914178						458631079314739200
		439156158423908352						458631773271097344
		439156381883830273						458634112727654400
		439157669996544000						458634790367793152
		439159165995737088						458635775585054720
		439160971136102401						458635903104479232
		439161557780795392						458638323012370432
		439161756406255618						458639269398335488
		439161868264173568						458639429226082304
		439165824142938114						458641579473764352
		439166997474336768						458642081066811394
		439167075433840642						458648221967851520
		439167534697558016						458648952691519489
		439171550018043905						458655070943715328
		439171659569057792						458656670714191873
		439171701226893314						458657036247777281
		439172212617408513						458659601173712897
		439172654273429506						458660425169924096
		439172692806488064						458662758230532097
		439172711789891585						458664507276267523
		439172828307660800						458665095858774016
		439173001389826048						458667222840668160
		439174654591508480						458667462054383616
		439175081714262016						458671524124569600
		439175108289384448						458672173872603136
		439175520337813504						458672310598508545
		439175542877995008						458673742835892225
		439175848244310016						458674456345718784
		439176499481313280						458674667549888512
		439177020648722432						458675167812919296
		439177052546408448						458676071454736387
		439177347309506561						458676125196353536
		439177691296976896						458676141864534017
		439178210191114241						458676162521497600
		439179225539833856						458676387592011777
		439179388689866753						458676415261863936
		439179574707232768						458676545922805760
		439179974764138496						458676758800506880
		439180397994594304						458676773736439808
		439180830171492352						458676965365792768
		439181565420396544						458677324024922112
		439181744131297280						458678270536712192
		439181959588511744						458679049670631424
		439182138831671296						458679786844737536
		439182255958020096						458679810538340352
		439182302359588864						458680115434897410
		439182320596451328						458680373531377664
		439182459604066305						458680491630419968
		439184485104353280						458680813073469441
		439185280793190401						458680862373318656
		439185624655200256						458680896972136449
		439186264315924480						458681146038288384
		439189854745001985						458681906553692160
		439195368598020096						458682469836128256
		439195810698637312						458682751265542146
		439203531841892352						458684345445007360
		439204954499067904						458684449556025344
		439205633322393600						458684757128523776
		439206064542982145						458685567350222849
		439207226918834177						458686006280335360
		439209392987066368						458686936568582144
		439212368677974016						458688159690534912
		439212963925598208						458688241810829312
		439214898141077505						458688603850162176
		439216916557594624						458688999545405441
		439223541880586240						458689780104970240
		439223574013165568						458689814016299009
		439223785775190016						458690737836544000
		439226401116672000						458691194013622272
		439226414282575872						458691401619083264
		439232534971682817						458691952095920128
		439233703190200320						458691963232202752
		439259691718549504						458692045759328256
		439263028253818880						458692129728905216
		439290648630673408						458692753317036032
		439301944319164416						458695599505018880
		439309034634899456						458698949004898304
		439309502047727617						458699369299337216
		439310292997009409						458699744282284032
		439325491494129665						458700362342363137
		439325595957489664						458700423163957248
		439331874154881024						458700450401759233
		439332012466249728						458700456332918784
		439332463161405440						458700461827055618
		439334989105090560						458700482010443776
		439344809833414656						458700483784237056
		439344912669347840						458700494240612353
		439349307356246016						458700505217126400
		439358316540887040						458700518554992640
		439359313984126976						458700520295657473
		439380983100760064						458700543251070976
		439407850511949824						458700544790392832
		439415933598437376						458700580924293120
		439421175320805376						458700639489384450
		439421399409909760						458700646250975232
		439431767918116864						458700700558434304
		439439917455007744						458700717662814208
		439441120305500160						458700753868054528
		439441792757690368						458700863196770304
		439443438057308160						458700902895849472
		439445347719729152						458701024144793600
		439446277450104832						458701104272797696
		439448956255621120						458701131124723712
		439454511292100609						458701216927596544
		439454553574871040						458701228310933504
		439460738995064832						458701289182863360
		439465076614254592						458701400952688640
		439465278448357376						458701604200271872
		439466057557082112						458701609619316737
		439471097051115520						458701622579707904
		439474534505545728						458701631626821633
		439486643092094976						458841616501850112
		439495161706721280						458850210199117824
		439496441661493248						458852537610031104
		439496450696040449						458859670036545537
		439500475260760064						458869329950683137
		439505870532382720						458885315919233025
		439510116715335680						458911324466970626
		439512611940761600						458935104153190400
		439514763589349376						458949967650906112
		439517494068670464						458954711627206656
		439518308241379328						458971243283501057
		439522016664616960						458971708943503360
		439523432225861632						458979778612035585
		439524093969596416						458983216188112897
		439524165658615808						458983315736117249
		439533145621553152						458983470162006017
		439536123820244992						458986285404004353
		439543494089400320						458987120036970496
		439543790756724736						458989557766033409
		439546030581743617						458990348854132737
		439546830351650817						458998250587295744
		439547147084521472						459002020108972032
		439548515900194816						459002929769615360
		439548576373682176						459004503086211072
								459016332152172544
								459017316970553344
								459018619293138944
								459045055186345985
								459052787633250304
								459071555277185024
								459073339433046016
								459077051639930881
								459085250686373890
								459091356250816512
								459094257752866816
								459098488006254592
								459099454230904832
								459107654866968576
								459110904261783553
								459116453418254336
								459130385176481792
								459133096097357824
								459143100364247041
								459153324970110976
								459158289876787200
								459161604576542721
								459166998535344128
								459180795068813312
								459204052866564096
								459204570951221248
								459209011972546560
								459209369565949952
								459209647912525824
								459232144485658625
								459236931008598016
								459238066260279296
								459240871385649152
								459240963723255808
								459263131861393408
								459263257631805440
								459263420387573760
								459271888947400704
								459272198919041024
								459292326142418944
								459304509026893824
								459306893467717632
								459307665941069824
								459323125428416512
								459329848016506880
								459329897882583041
								459332459566358530
								459357504582205440
								459359296460165121
								459360175154270208
								459365704475873280
								459371454585659393
								459379609700945921
								459385759884001282
								459392864540041216
								459399979371880449
								459401170457735168
								459401186610012161
								459425491267497984
								459438695917965312
								459440862687027200
								459468194944909312
								459468202985398272
								459487686722850817
								459494460196278272
								459505329298890752
								459507754164449280
								459511885747212289
								459514046849761280
								459514052306546688
								459515314792054785
								459515423612891137
								459515674722054144
								459516055212548096
								459516786397155328
								459522562335064064
								459523164402642944
								459523732470366208
								459523909592031232
								459571015291785216
								459580106970005504
								459580168466870272
								459586694136987649
								459590430737592320
								459598125909671936
								459606838716432384
								459616053510029312
								459618789550993408
								459632807984517120
								459650225880039424
								459659473594748930
								459668429486559232
								459671054420418561
								459676626369134592
								459700510657118208
								459700961360240641
								459728289465393152
								459731401588609024
								459731634506711040
								459739726355124224
								459760634192609280
								459767498506657792
								459767770021113859
								459769033139945473
								459770153274998785
								459771151678320640
								459771691770454016
								459775388802379777
								459789337866285056
								459797503966466049
								459798757035360256
								459802970633146368
								459808551557292033
								459811956988588032
								459814258692620288
								459814498820706305
								459816248772423680
								459834089043148800
								459834122362687488
								459834150019936256
								459834198376058880
								459894522429054978
								459907379833085952
								459920537457008640
								459945271498387456
								459950473660096512
								459986136543551488
								459992297346985984
								460014694015987712
								460032346847465472
								460052527128399872
								460054310613975040
								460077324218937344
								460081411949477889
								460081422959931396
								460098304505020417
								460110287966728192
								460115480112418816
								460128670229991424
								460138686017843200
								460139499973246976
								460139971672686593
								460140823296737280
								460141413045649409
								460153916961718273
								460154751863103488
								460158829955915776
								460163129683771393
								460178260102750208
								460191929045508096
								460194942292623362
								460195773196795904
								460199384886411264
								460201670865997824
								460202778351386624
								460213599433412608
								460214111217790976
								460214278466048000
								460216173662334976
								460220715476598784
								460233761876344832
								460237683831635968
								460259840737431552
								460263364581543936
								460269765928701953
								460274635720757248
								460274878570979328
								460275251020955648
								460281769456320512
								460296885195276288
								460297291463540736
								460298001752158208
								460301502842957824
								460325646409793536
								460326915803742208
								460327214731370497
								460327817629036545
								460328361361825792
								460335368853028864
								460354663079219200
								460355995605434368
								460417633863892992
								460451216602853377
								460478353841983488
								460509961291063296
								460575597404499968
								460589869702840320
								460594006301609984
								460597067736694784
								460597405797199872
								460597459543019520
								460630824099250176
								460632286954663936
								460641490784751616
								460649779450478592
								460650000704237568
								460652114390552576
								460652232237940736
								460653263407181825
								460653562461028352
								460654207721545728
								460657432234967041
								460658424691179520
								460659519920803840
								460681563240669184
								460693138416627712
								460708057182662656
								460708177861148672
								460717867013771264
								460727762534547456
								460739130847404032
								460740487637643264
								460749648496697344
								460751555613184000
								460753491468640256
								460754347853643778
								460762025468391424
								460771526451544065
								460772836362055681
								460775633572741121
								460775647514603520
								460790011332665345
								460790800948150273
								460804065484890112
								460811553869414400
								460828103091433472
								460850898629980161
								460852816647421952
								460869973423194113
								460874764857647104
								460875136548102144
								460886881740136449
								460886900073832448
								460887058543034368
								460887123026268160
								460891246522040321
								460892495157948416
								460893245565046784
								460896205468622848
								460896391901249536
								460899997073297408
								460902051422433280
								460905401735970816
								460906123961585664
								460906879984861184
								460910378525163520
								460912899209576448
								460913023448657920
								460913818693279745
								460914843483004928
								460917016015425536
								460923773815123968
								460924119895539712
								460927323294822400
								460933984961060866
								460934329099878400
								460934580149972992
								460934670608519169
								460934821242748928
								460936115491704832
								460939384791908355
								460939969922486273
								460940288165310465
								460940464875511808
								460940916262318081
								460941363664539648
								460941407213977600
								460941849075908609
								460942431266291714
								460943909360009217
								460945752181583872
								460951988831023104
								460957888216059904
								460957889080098816
								460959169848541184
								460959220448243712
								460961020794920960
								460964467249930240
								460965393784266753
								460967001599406081
								460969388040937474
								460969533943988224
								460969646733012993
								460969664970260480
								460970660575973376
								460970791350177792
								460970813068308480
								460974939395616768
								460976739045236737
								460979086819471360
								460980335480565760
								460985851678568448
								460985973510111232
								460987086955216896
								460988508077694976
								460988893048102912
								460989906173427713
								460990169533792257
								460990194314145792
								460990456331911168
								460991133888163841
								460991246711156736
								460991309122371584
								460991723993186305
								460992697801920512
								460992803892645888
								460993282550423552
								460993591460888576
								460994772501823488
								460995017708822528
								460996530489794560
								461003848950116352
								461015169922265089
								461033336237195264
								461048323550756865
								461048673200517120
								461058368883658752
								461087270758801408
								461103268295610368
								461104543196262400
								461121195945910274
								461121894176284672
								461123004542382080
								461126820927373312
								461129065416491008
								461130055629160448
								461140220701081600
								461140508392161280
								461140607789182977
								461145719726804993
								461152370106568704
								461161317739810816
								461163550686195713
								461166723803414528
								461169714660528130
								461170514921156608
								461175468310663170
								461194598627291136
								461203351393558528
								461207793480245249
								461207882697289728
								461211279932526594
								461211782623662080
								461212540836401152
								461213510072930304
								461213810851078144
								461213999262990337
								461214944206139393
								461217060249669632
								461219062123462657
								461224527952097280
								461227184774844417
								461229605144510464
								461230108087312385
								461230469422776320
								461240087964286978
								461241928273887232
								461242625992192001
								461249883123372033
								461251319362113536
								461252996127391747
								461253763748364289
								461253776595513345
								461254402817667072
								461254797333520384
								461257738505314304
								461266903332560897
								461267217280008192
								461267718671314944
								461268122235047937
								461268806527352834
								461276498020667392
								461278213742682112
								461278718712119296
								461279842197991424
								461280600855674880
								461283472695259137
								461288074652045312
								461294559822356480
								461295720998244352
								461296724946862080
								461299613664686080
								461299668639436800
								461304642958536704
								461308932661968896
								461313203130347520
								461315111605374976
								461315648727965696
								461315787547213825
								461316055982698496
								461316456740057088
								461321570955591680
								461323500557320192
								461329580750802944
								461330823762161666
								461333837839343617
								461334461271928832
								461334465063563264
								461338191350349824
								461338884723707904
								461340082528866304
								461340925336121344
								461353642084556800
								461361399609176064
								461362462827098112
								461364215970672640
								461369252831068160
								461379178424569856
								461385058683604992
								461393390861447168
								461406255157084160
								461412377314230272
								461427541362741248
								461439938677202945
								461447967749455872
								461451324169539585
								461467171735216128
								461483202696478720
								461483405449125889
								461484548745093120
								461486165057482752
								461486194698625024
								461486470524858369
								461488279205199872
								461494255069179904
								461494322933026816
								461494842774679552
								461495913479802881
								461501928199827456
								461502819825369088
								461504733887594497
								461504793228230659
								461504847372509184
								461504916297490434
								461505256086441984
								461505413595537408
								461505499692019712
								461505783172460544
								461505983102353410
								461506191592415233
								461507116876840961
								461507273399861248
								461507443457916932
								461507533044084736
								461507665139490816
								461507757288341504
								461507850398076929
								461507964114063361
								461508153524236288
								461508159790927873
								461508431010992128
								461508626666897409
								461509153077600256
								461509157305061376
								461510001606279168
								461510847320186880
								461510931055255553
								461511062253498368
								461511373390770176
								461511493490466817
								461511805005991936
								461512431361982464
								461514032894066689
								461515338212200448
								461515338442502144
								461515703766765568
								461516711791841281
								461519413837979649
								461519583846084608
								461519717954781186
								461520302220931072
								461521032088920064
								461521418228756481
								461523733258436608
								461524183294296064
								461524253477588992
								461526418468253696
								461528170747817984
								461529254207819776
								461529739316826112
								461530247934930946
								461530588273717249
								461530654354993152
								461535524495564803
								461538022782038017
								461538166437322752
								461538547494039554
								461538674128064512
								461538882870206466
								461539196289564672
								461539238836592640
								461539328804405248
								461539400728723457
								461540755350507520
								461541372927807491
								461541416166899715
								461541971362738176
								461542829727051776
								461543184376791040
								461543449112489984
								461544067223257090
								461546972722126848
								461550129963892736
								461552765223706625
								461554891601616896
								461555587399286784
								461557431915806720
								461563505749917696
								461564551482601472
								461566819284058112
								461568290901729280
								461572006505623552
								461572727422582785
								461573067718672386
								461573421856743425
								461574036649426944
								461574514636496897
								461576335840657408
								461576340538281986
								461578816197246977
								461584165184364544
								461584255920119808
								461586272252100608
								461586305269256193
								461586445698740224
								461586456255815681
								461586583926624257
								461586987506753536
								461587018443923456
								461587315815485442
								461587767093645312
								461589078333734912
								461592563099525120
								461592959046402049
								461593788457037824
								461594617457033216
								461595856157040640
								461596590026031104
								461596732342960128
								461599730896605184
								461601357569732608
								461603249477664768
								461603607406587905
								461609190856069120
								461609233767993344
								461609659640446976
								461610291823149056
								461614120790667264
								461614538283286529
								461614680591835138
								461614705183047680
								461614743036641280
								461614785118076928
								461614791581110272
								461614818173394944
								461614851220320257
								461614883319320576
								461614983667671040
								461615004228149248
								461615061338161153
								461615138483994624
								461615210340839426
								461615294037762048
								461615486837325824
								461615555011567617
								461615716844584962
								461615735597727744
								461615777419128832
								461616093820637184
								461616184442355712
								461616966461972481
								461617088730513409
								461617132799655936
								461617436257570816
								461617630705500160
								461617931655598080
								461617983039614976
								461618421315035137
								461618500445163520
								461618669383340032
								461619025295187968
								461619133684011008
								461619831943749632
								461620316511670272
								461621514626805760
								461621732936122368
								461622368712929280
								461623518333911041
								461623578081783808
								461623662307581952
								461623718096437248
								461623729693270017
								461623753068134401
								461623789847990273
								461623819300392960
								461623882651537409
								461623893145714688
								461623936120524801
								461624011013648384
								461624028155748352
								461624040508370944
								461624074037628928
								461624152764321792
								461624160603873280
								461624169055014913
								461624184087396355
								461624321450852352
								461624494780862464
								461624570747691008
								461624575865155584
								461624587109666816
								461624634006179843
								461624692948754433
								461624716889845760
								461624831885070336
								461624884297465856
								461624898843336705
								461624991696838656
								461625116422852608
								461625138673221632
								461625167026741248
								461625247465476096
								461625270102163456
								461625307846680576
								461625443603337218
								461625488088498176
								461625495541792768
								461625548079251457
								461625550256099328
								461625568908165122
								461625684620636160
								461625690773671937
								461625828494016512
								461625846386950145
								461625855093911552
								461625929765515264
								461625976066428928
								461626072417591296
								461626170027802624
								461626197160374272
								461626312000806912
								461626315150344192
								461626522936573952
								461626618830548992
								461626659473747969
								461626922783748096
								461626941842653185
								461627015008124928
								461627071685345281
								461627233681960960
								461627409234939905
								461627471168036864
								461627519880683520
								461627665917956096
								461627669734367233
								461627694644748288
								461627706170298370
								461627799951118338
								461628020717928448
								461628061201752064
								461628072153063424
								461628073679400960
								461628461363494914
								461628478132322304
								461628603898556417
								461628785532489729
								461629066274017280
								461629101283868672
								461629230120304641
								461629374748311552
								461629424173993984
								461629450468065280
								461629583025266688
								461629654001274880
								461630051977412608
								461630097121091584
								461630145313247232
								461630170038685696
								461630247713009664
								461630356035080192
								461630356928880640
								461630497911619585
								461630498717323264
								461630530136858624
								461630657291386880
								461630771019907072
								461630812073390080
								461630914405998593
								461631095432163328
								461631109240205312
								461632119413145601
								461634863737872385
